# Supplementary material for: Atypical Antiglomerular Basement Membrane Nephritis Following Immune Checkpoint Inhibitor
Source: PubMed Central journal article supplement — Kidney Int Rep. 2022 May 3;7(8):1913–6. doi: 10.1016/j.ekir.2022.04.089 (PMC9366294; doi:10.1016/j.ekir.2022.04.089), 2022-05-03
Supplement: mmc1.pdf [file mmc1.pdf]

**Table S1.** Summary of reported cases of anti-glomerular basement membrane disease following immune checkpoint inhibitor therapy

|                                      | Sammartino et al. 2010 <sup>S3</sup>        | Takahashi et al. 2018 <sup>S4#</sup> | Hultin et al. 2020 <sup>S5</sup>             | Kyriazis et al. 2021 <sup>S6</sup>                                      | Present case                 |
|--------------------------------------|---------------------------------------------|--------------------------------------|----------------------------------------------|-------------------------------------------------------------------------|------------------------------|
| No of patients                       | 1                                           | 1                                    | 1                                            | 1                                                                       | 1                            |
| Age, years                           | 50                                          | 74                                   | NA                                           | 58                                                                      | 74                           |
| Sex                                  | M                                           | M                                    | M                                            | M                                                                       | M                            |
| Cancer type                          | Melanoma                                    | Adenocarcinoma of the lung           | Melanoma                                     | Melanoma                                                                | Squamous cell lung carcinoma |
| ICI therapy                          | Anti-CTLA-4 tremelimumab                    | Anti-PD-1 nivolumab                  | Anti-CTLA-4 ipilimumab + anti-PD-1 nivolumab | Anti-CTLA-4 ipilimumab + anti-PD-1 nivolumab                            | Anti-PD-1 pembrolizumab      |
| Cancer outcome                       | Stable                                      | Stable                               | Complete response                            | Stable                                                                  | Partial response             |
| Delay after ICI introduction, months | 13.5                                        | 4                                    | 12                                           | 16                                                                      | 2                            |
| Creatinine at presentation, mg/dL    | 3.3                                         | 1.98                                 | 15.6                                         | 2.4                                                                     | 5.6                          |
| Proteinuria at presentation          | NA                                          | 2+ dipstick result                   | NA                                           | 2 g/g creatinine                                                        | 12 g/g creatinine            |
| Oliguria                             | Yes                                         | Yes                                  | NA                                           | No                                                                      | No                           |
| Pulmonary hemorrhage                 | No                                          | Yes                                  | NA                                           | No                                                                      | No                           |
| Renal biopsy findings                |                                             |                                      |                                              |                                                                         |                              |
| %crescents                           | 71%                                         | NA                                   | >95%                                         | 13%                                                                     | 23%                          |
| %GS                                  | 6%                                          | NA                                   | NA                                           | 0                                                                       | 45%                          |
| ANCA                                 | Negative                                    | NA                                   | NA                                           | Negative                                                                | Negative                     |
| Anti-GBM antibody                    | Positive                                    | Positive                             | Positive                                     | Negative                                                                | Negative                     |
| Treatment                            | Steroids, cyclophosphamide, plasma exchange | Steroids, plasma exchange            | Steroids, cyclophosphamide, plasma exchange  | Steroids, cyclophosphamide                                              | Rituximab, plasma exchange   |
| Outcome                              | ESKD                                        | ESKD, death                          | Partial response                             | Partial response but relapse 4 weeks after reinitiating nivolumab, ESKD | ESKD                         |

Abbreviations: ANCA, antineutrophil cytoplasmic antibody; CTLA-4, cytotoxic T-lymphocyte-associated protein 4; ESKD, end-stage kidney disease; GBM, glomerular basement membrane; GS, global glomerulosclerosis; ICI, immune checkpoint inhibitor; PD-1, programmed cell death protein 1.

#autopsy case.

### **Supplemental References**

- S1. Clatworthy MR, Wallin EF, Jayne DR. Anti-glomerular basement membrane disease after alemtuzumab. *N Engl J Med.* 2008;359:768-769.
- S2. Al-Chalabi S, Wu HHL, Chinnadurai R, Ponnusamy A. Etanercept-Induced Anti-Glomerular Basement Membrane Disease. *Case Rep Nephrol Dial.* 2021;11:292-300.
- S3. Sammartino C, Goodman D, Flanagan G, et al. Anti-GBM disease following CTLA4 blockade in a patient with metastatic melanoma, *NDT Plus.* 2010;3:135-137.
- S4. Takahashi N, Tsuji K, Tamiya H, et al. Goodpasture's disease in a patient with advanced lung cancer treated with nivolumab: An autopsy case report. *Lung Cancer.* 2018;122:22-24.
- S5. Hultin S, Nahar K, Menzies AM, et al. Histological diagnosis of immune checkpoint inhibitor induced acute renal injury in patients with metastatic melanoma: a retrospective case series report. *BMC Nephrol.* 2020;21:391.
- S6. Kyriazis P, Tiwary A, Freeman J, et al. Atypical anti-glomerular basement membrane glomerulonephritis in a patient with metastatic melanoma treated with mitogen-activated protein kinase and immune checkpoint inhibitors: a case report. *J Med Case Rep.* 2021;15:186.
